# Supplementary material for: Structural diversity of luminescent lanthanide metal–organic frameworks based on a V-shaped ligand
Source: Royal Society of Chemistry journal article supplement (doi:10.1039/c4ce02380c), 2014-12-23
Supplement: c4ce02380c1.pdf [file c4ce02380c1.pdf]

Supporting Information

**Structural Diversity of Luminescent Lanthanide Metal-Organic Frameworks based on a V-Shaped Ligand**

*Yan-Fei He, Di-Ming Chen, Hang Xu and Peng Cheng\**

Department of Chemistry, Key Laboratory of Advanced Energy Material Chemistry (MOE), and Collaborative Innovation Center of Chemical Science and Engineering (Tianjin), Nankai University, Tianjin 300071, P. R. China

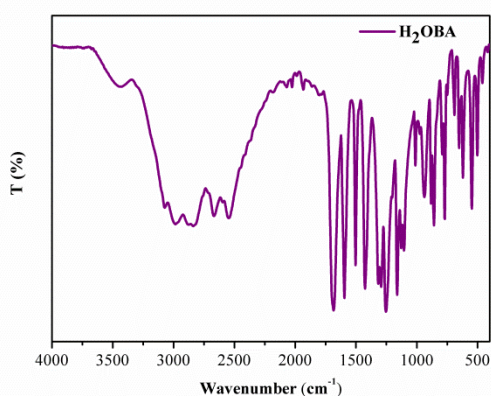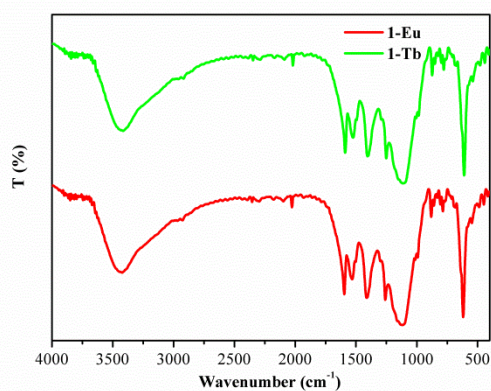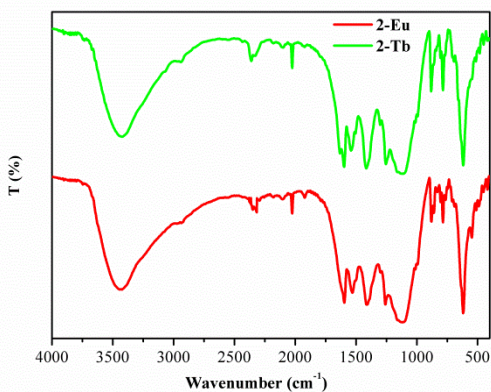

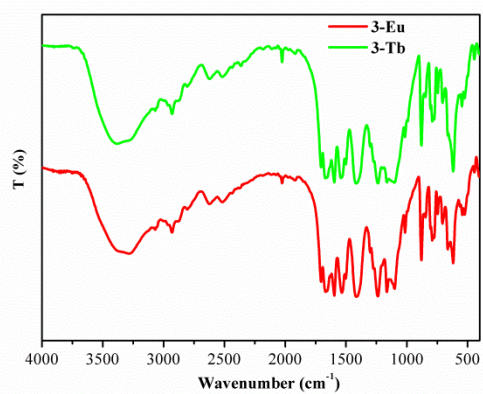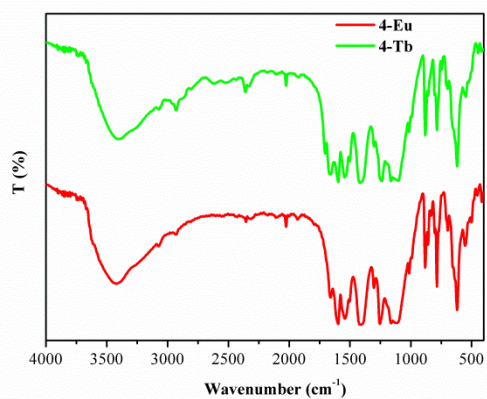

**Figure S1.** Infrared spectra of the ligand and complexes **1-4**.

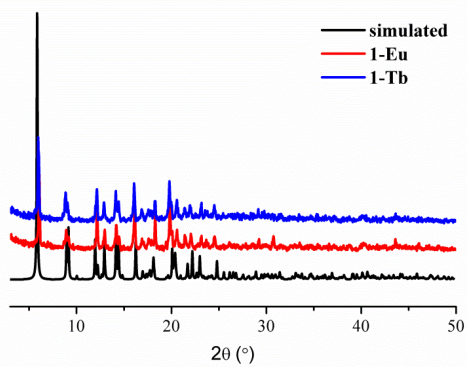

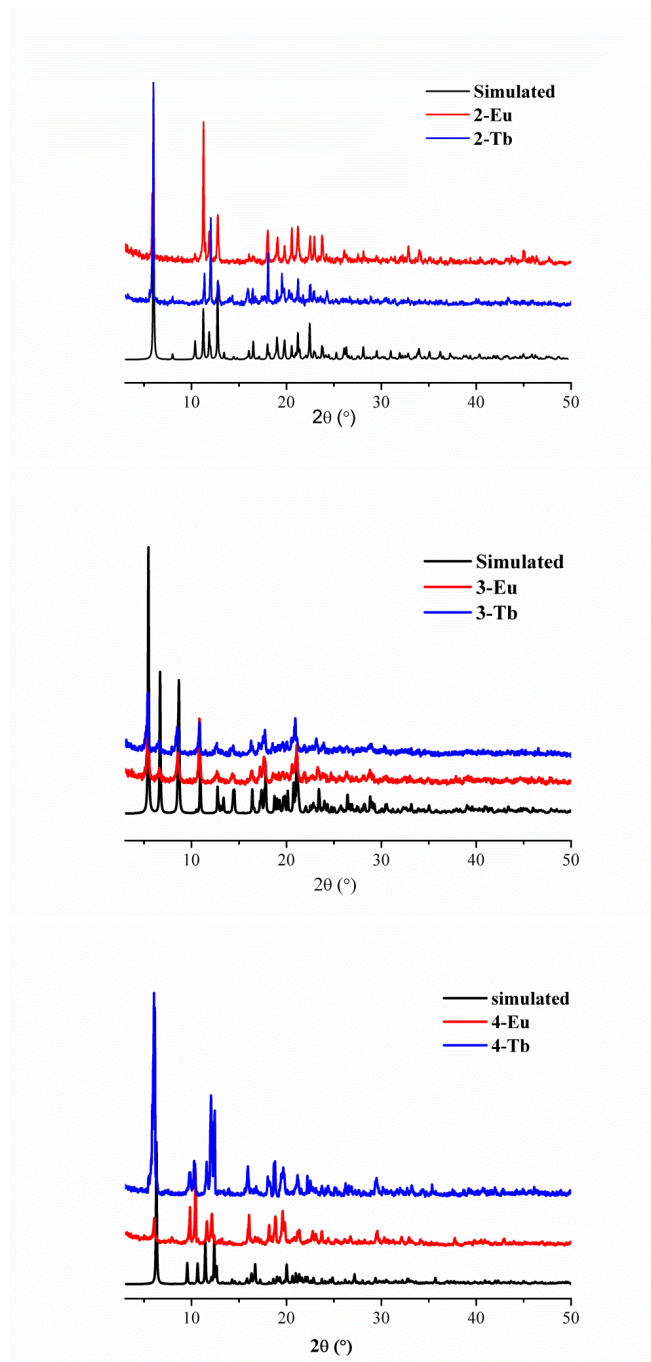

**Figure S2.** The simulated patterns from single crystal data and experimental PXRD patterns of all complexes.

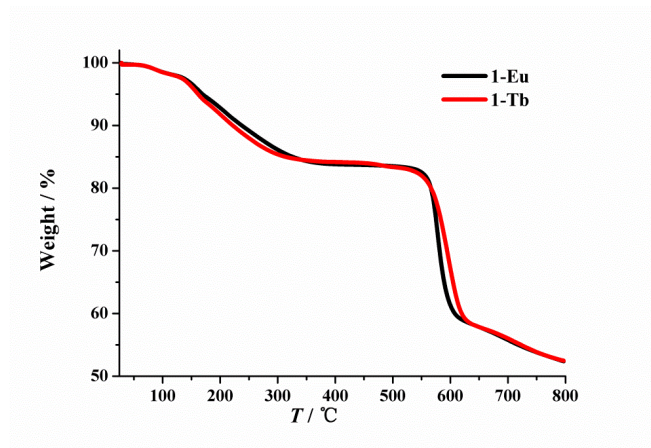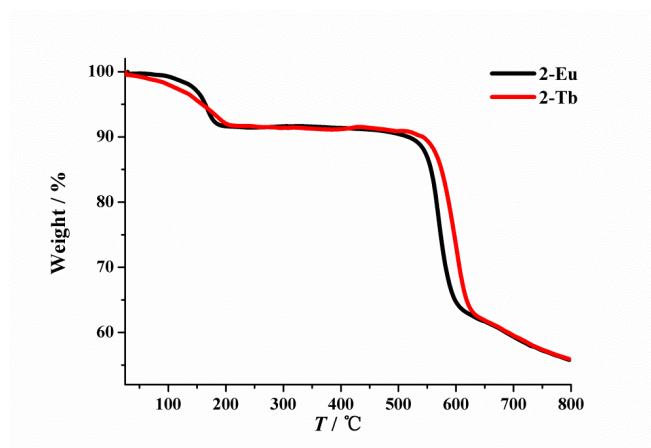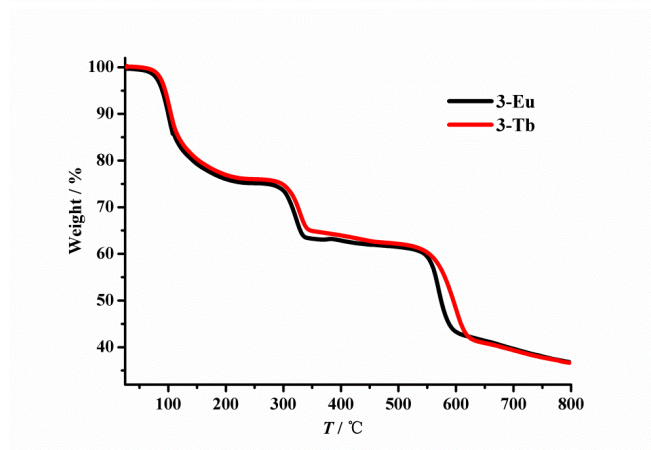



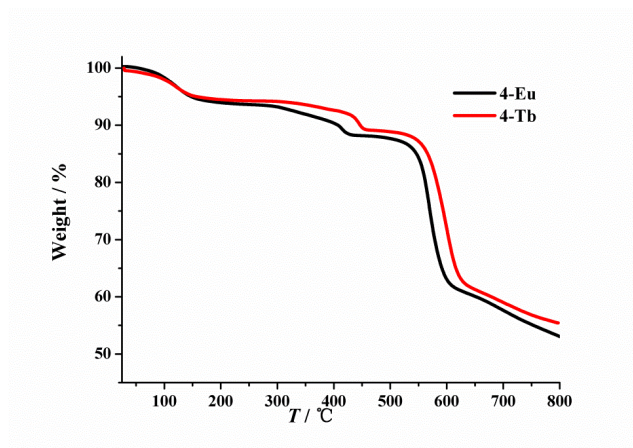

**Figure S3.** Thermogravimetric curve of all complexes.

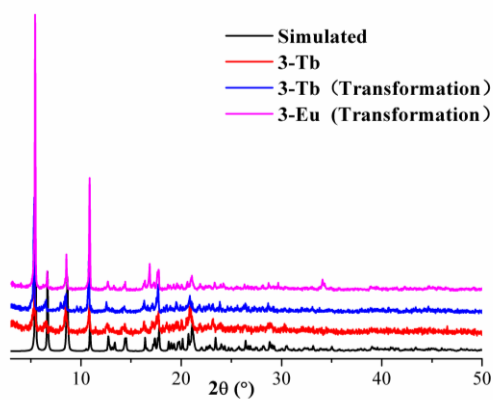

**Figure S4.** PXRD pattern of the transformation from **4** to **3**.

**Table S1.** Important IR bands of the ligands and Ln-MOFs(**1-4**). ( $\text{cm}^{-1}$ )

| Complexes          | $\nu_{\text{C=O}}$ | $\nu_{\text{as}}(\text{COO}^-)$ | $\nu_{\text{s}}(\text{COO}^-)$ |
|--------------------|--------------------|---------------------------------|--------------------------------|
| H <sub>2</sub> OBA | 1683               | —                               | —                              |
| 1-Eu               | —                  | 1598                            | 1413                           |
| 1-Tb               | —                  | 1596                            | 1412                           |
| 2-Eu               | —                  | 1596                            | 1411                           |
| 2-Tb               | —                  | 1598                            | 1415                           |
| 3-Eu               | —                  | 1596                            | 1413                           |
| 3-Tb               | —                  | 1596                            | 1415                           |
| 4-Eu               | —                  | 1597                            | 1410                           |
| 4-Tb               | —                  | 1597                            | 1414                           |
